# Supplementary material for: The Effect of Mineralocorticoid Receptor 3 Antagonists on Anti-Inflammatory and Anti-Fatty Acid Transport Profile in Patients with Heart Failure
Source: MDPI journal article supplement (doi:10.3390/cells11081264), 2022-04-08
Supplement: s1 [file s1]

Supplementary Table S1. Sequence 5' --> 3' of primers forward and reverse

| Primer         | Sequence 5' --> 3'         |
|----------------|----------------------------|
| ADIPOQ forward | TGGTGAGAAGGGTGAGAA         |
| ADIPOQ reverse | AGATCTTGGTAAAGCGAATG       |
| ACTB forward   | TTCTGACCCATGCCCACCAT       |
| ACTB reverse   | ATGGATGATGATATCGCCGCGCTC   |
| DEFA3 forward  | TCCCAGAAGTGGTTGTTTCC       |
| DEFA3 reverse  | CAGAATGCCCAGAGTCTTCC       |
| CD31 forward   | AACAGTGTTGACATGAAGAGCC     |
| CD31 reverse   | TGTAAACAGCACGTCATCCTT      |
| α-SMA forward  | CCGACCGAATGCAGAAG GA       |
| α-SMA reverse  | ACAGAGTATTTGCGCTCCGAA      |
| FABP4 forward  | TACTGGGCCAGGAATTTGAC       |
| FABP4 reverse  | GTGGAAGTGACGCCTTTTCAT      |
| CD11b forward  | CAGCCTTTGACCTTATGTCATGG    |
| CD11b reverse  | CCTGTGCTGTAGTCGCACT        |
| CXCR2 forward  | CGAAGGACCGTCTACTCATC       |
| CXCR2 reverse  | AGTGTGCCCTGAAGAAGAGC       |
| CD36 forward   | TCTTTCCTGCAGCCCAATG        |
| CD36 reverse   | AGCCTCTGTTCCAAGTATAGTGA    |
| COL1A2 forward | TCGCACATGCCGTGACTTG        |
| COL1A2 reverse | GATAGCATCCATAGTGCATCCTTG   |
| PREF1 forward  | CTGGACGGTGGCCTCTATGAATG    |
| PREF1 reverse  | ATCATCCACGCAGGTGCCTC       |
| CD68 forward   | CTTTGGGCAAGGTTTCTCCTGCC    |
| CD68 reverse   | CTCCGGATGATGCAGAAAGC       |
| CD3 forward    | TGCTCCACGCTTTTGCCGGAGGACAG |
| CD3 reverse    | TAGGAGGAGAACACCTGGACTACTC  |
| ITLN1 forward  | AACAGCTCCCTGCTGAGGTA       |
| ITLN1 reverse  | GCTGGCCATAGGGTGAGTAA       |
